# Supplementary material for: Borenium cations derived from BODIPY dyes
Source: Royal Society of Chemistry journal article supplement (doi:10.1039/b808739c), 2008-01-01
Supplement: b808739c.pdf [file b808739c.pdf]

## Electronic Supporting Information.

### Borenum Cations Derived from BODIPY Dyes

Catherine Bonnier<sup>a</sup> Warren E. Piers,<sup>\*a</sup> Masood Parvez<sup>a</sup> and Ted S. Sorensen<sup>a</sup>

### General Experimental Procedures

All operations were performed under a purified argon atmosphere using glovebox or vacuum line techniques. Toluene and hexanes solvents were dried and purified by passing through activated alumina, and vacuum distilled from Na/benzophenone. Et<sub>2</sub>O was dried over Na/K alloy and vacuum distilled from Na/benzophenone. Pentane was dried and vacuum distilled from Na/benzophenone. NEt<sub>3</sub> and CH<sub>2</sub>Cl<sub>2</sub> were dried over and distilled from CaH<sub>2</sub>. Phenylacetylene was purchased from Aldrich and passed through a column of alumina immediately prior to use. [Ph<sub>3</sub>C][B(C<sub>6</sub>F<sub>5</sub>)<sub>4</sub>] was generously given by Nova Chemicals Inc. Silica gel column chromatography was carried out on Geduran Silica 60 silica gel (particle size 40-63 μm). Diisobutylaluminum chloride (25 % w/w in hexanes) and lithium deuteride were purchased from Alfa Aesar and used as received. Diisobutylaluminum hydride (DIBAL-H, 1.0 M in CH<sub>2</sub>Cl<sub>2</sub>) was purchased from Aldrich and used as received. Et<sub>3</sub>SiH was purchased from Aldrich and vacuum distilled prior to use. *trans*-crotonaldehyde was purchased from Aldrich and distilled under argon prior to use. All NMR spectra were recorded in dry, oxygen-free CD<sub>2</sub>Cl<sub>2</sub> on a Bruker AMX-300 MHz (operating at 300 MHz (<sup>1</sup>H), 46 MHz (<sup>2</sup>H), 96 MHz (<sup>11</sup>B), 75 MHz (<sup>13</sup>C) or 282 MHz (<sup>19</sup>F)) at 25 °C unless otherwise specified. Chemical shifts were reported relative to residual solvent signal (<sup>1</sup>H, <sup>2</sup>H and <sup>13</sup>C{<sup>1</sup>H}), BF<sub>3</sub>•OEt<sub>2</sub> (<sup>11</sup>B) and C<sub>6</sub>F<sub>6</sub> (<sup>19</sup>F) standards. Infrared spectra (FTIR) were recorded on a Nicolet Nexus 470 as thin film (KBr pellets). Low-resolution mass spectra were obtained on a Bruker Esquire 3000 spectrometer operating in electrospray ionization (ESI) mode. Fluorescence spectra were obtained on a Yvon-Jobin spectrophotometer with excitation and emission set to 1.0 nm bandpass, and λ<sub>max</sub> values for absorption taken from the excitation spectra. Fluorescence quantum yield values were measured in CH<sub>2</sub>Cl<sub>2</sub> and reported relative to rhodamine 6G in methanol (φ<sub>f</sub> = 0.80),<sup>1a</sup> corrected for the difference in solvent refractive index.<sup>1b</sup> X-ray crystallographic analyses were performed on suitable crystals coated in perfluoropolyalkyl ether oil (1600 cSt) and mounted on a Nonius Kappa CCD diffractometer. Elemental analyses were performed on a Perkin Elmer Model 2400 series II by Johnson Li (University of Calgary).

[Et<sub>3</sub>Si][B(C<sub>6</sub>F<sub>5</sub>)<sub>4</sub>] was prepared according to Scott et al. and immediately used in the next step.<sup>2</sup> N,N'-difluoroboryl-4,4'-diethyl-3,3',5,5'-tetramethyldipyromethene (**1**) was synthesized as previously reported<sup>3</sup> by using toluene and NEt<sub>3</sub> as solvent and base respectively. Diisobutylaluminum deuteride (DIBAL-D) was prepared according to Eisch et al.<sup>4</sup>

### Methods

The determination of the Lewis acidity was made according to a modification of Childs' method.<sup>5</sup> The studied compound was loaded in a thick wall 5 mm J Young NMR tube. The correct amount of *trans*-crotonaldehyde was added to the NMR tube to have an

excess of approximately 75 % of the borenium compound.  $\text{CD}_2\text{Cl}_2$  was then condensed at  $-78\text{ }^\circ\text{C}$  and the NMR spectra were recorded at  $-20\text{ }^\circ\text{C}$ .

### Syntheses

Synthesis of [**2-F**]: Under an argon atmosphere, **1** (0.304 g, 1.0 mmol) and  $[\text{Et}_3\text{Si}][\text{B}(\text{C}_6\text{F}_5)_4]$  (0.936 g, 1.18 mmol) were mixed together. The flask was evacuated and  $\text{CH}_2\text{Cl}_2$  ( $\approx 50\text{ mL}$ ) was condensed into the flask. The purple solution was stirred 15 minutes at room temperature and solvent and other volatile compounds were removed *in vacuo*. Pentane ( $\approx 50\text{ mL}$ ) was condensed onto the residue and was sonicated for 30 minutes. The solid was filtered, washed with pentane and volatiles were removed *in vacuo* to afford a dark purple solid. Two crops of suitable X-ray crystals obtained from a concentrated  $\text{CH}_2\text{Cl}_2$  solution layered with hexanes gave 0.856 g (0.89 mmol) of [**1-F**] (yield: 89 %).  $^1\text{H}$  NMR ( $\text{CD}_2\text{Cl}_2$ , 300 MHz, 203 K): 7.42 (s, 1H), 2.50 (s, 6H), 2.38 (q, 4H,  $^3J_{\text{HH}} = 7.6\text{ Hz}$ ), 2.29 (s, 6H), 1.00 (t, 6H,  $^3J_{\text{HH}} = 7.5\text{ Hz}$ ); partial  $^{13}\text{C}\{^1\text{H}\}$  NMR ( $\text{CD}_2\text{Cl}_2$ , 75 MHz, 203 K): 159.40, 153.63, 139.04, 136.00, 121.29, 19.28, 17.34, 13.89, 11.25 (signals for the  $\text{B}(\text{C}_6\text{F}_5)_4$  anion were not assigned);  $^{19}\text{F}$  NMR ( $\text{CD}_2\text{Cl}_2$ , 282 MHz, 203 K): -118.4 (s, broad, 1F, BF), -131.6 (s, 2F), -160.9 (t, 1F,  $^3J_{\text{FF}} = 28\text{ Hz}$ ), -164.9 (m, 2F);  $^{11}\text{B}$  NMR ( $\text{CD}_2\text{Cl}_2$ , 96 MHz, 203 K) 1.2 (broad, BF), -15.8 (s, [ $\text{B}(\text{C}_6\text{F}_5)_4$ ]).  $\lambda_{\text{max}}$ : 413, 592 nm;  $\lambda_{\text{em}}$ : 609. Anal. Calcd for  $\text{C}_{41}\text{H}_{23}\text{F}_{21}\text{B}_2\text{N}_2$ : C, 51.07; H, 2.40; N, 2.91. Found: C, 51.09; H, 2.67; N, 2.92.

Synthesis of [**2-H**]: Under an argon atmosphere, a  $\text{CH}_2\text{Cl}_2$  solution of DIBAL-H (0.115 mL, 0.115 mmol) was added to [**2-F**] (111 g, 0.115 mmol) and the solution was diluted with  $\text{CH}_2\text{Cl}_2$  (20 mL). The solution was stirred 15 minutes and the solvent and other volatile byproducts were removed *in vacuo*. Pentane ( $\approx 20\text{ mL}$ ) was condensed onto the residue and was sonicated for 30 minutes. The solid was decanted and dried *in vacuo* to afford a dark blue solid. Suitable X-ray crystals obtained from a concentrated  $\text{CH}_2\text{Cl}_2$  solution layered with hexanes gave 92 g (0.097 mmol) of [**2-H**] (yield: 85 %).  $^1\text{H}$  NMR ( $\text{CD}_2\text{Cl}_2$ , 300 MHz): 7.40 (s, 1H), 2.55 (s, 6H), 2.45 (q, 4H,  $^3J_{\text{HH}} = 7.6\text{ Hz}$ ), 2.33 (s, 6H), 1.11 (t, 6H,  $^3J_{\text{HH}} = 7.6\text{ Hz}$ ); partial  $^{13}\text{C}\{^1\text{H}\}$  NMR ( $\text{CD}_2\text{Cl}_2$ , 75 MHz): 160.43, 154.04, 139.18, 135.06, 121.72, 17.65, 13.88, 12.71, 11.15 (signals for the  $\text{B}(\text{C}_6\text{F}_5)_4$  anion were not assigned);  $^{19}\text{F}$  NMR ( $\text{CD}_2\text{Cl}_2$ , 282 MHz): -133.1 (s, 2F), -163.7 (t, 1F,  $^3J_{\text{FF}} = 28\text{ Hz}$ ), -167.5 (m, 2F);  $^{11}\text{B}$  NMR ( $\text{CD}_2\text{Cl}_2$ , 96 MHz): 24.0 (broad, BH), -16.9 (s, [ $\text{B}(\text{C}_6\text{F}_5)_4$ ]).  $\lambda_{\text{max}}$ : 409, 589 nm;  $\lambda_{\text{em}}$ : 599. Anal. Calcd for  $\text{C}_{41}\text{H}_{24}\text{F}_{20}\text{B}_2\text{N}_2$ : C, 52.04; H, 2.56; N, 2.96. Found: C, 51.35 ; H, 2.63; N, 2.90.

Synthesis of [**2-D**]: Performed according to the preparation of [**2-H**] by adding the appropriate amount of a 1 M  $\text{CH}_2\text{Cl}_2$  solution of DIBAL-D. Yield: 89 %.  $^2\text{H}$  NMR ( $\text{CH}_2\text{Cl}_2$ , 46 MHz): 7.45 (broad).

Synthesis of [**3-H**]: Under an argon atmosphere, [**2-H**] (80 mg, 0.085 mmol) and DMAP (11 g, 0.085 mmol) were mixed together.  $\text{CH}_2\text{Cl}_2$  ( $\approx 20\text{ mL}$ ) was condensed onto the solids and the solution was stirred 15 minutes at room temperature. The solvent was removed *in vacuo* and pentane ( $\approx 20\text{ mL}$ ) was condensed onto the oily residue. The suspension was sonicated 15 minutes and volatiles were decanted to leave 51 mg (0.048

mmol) of an orange-red powder (yield: 56 %).  $^1\text{H}\{^{11}\text{B}\}$  NMR ( $\text{CD}_2\text{Cl}_2$ , 300 MHz): 7.70 (d, 2H,  $^3J_{\text{HH}} = 7.6$  Hz), 7.31 (s, 1H), 6.56 (d, 2H,  $^3J_{\text{HH}} = 7.6$  Hz), 4.40 (s, BH), 3.10 (s, 6H), 2.38 (q, 4H,  $^3J_{\text{HH}} = 7.6$  Hz), 2.25 (s, 6H), 2.13 (s, 6H), 1.01 (t, 6H,  $^3J_{\text{HH}} = 7.6$  Hz);  $^{11}\text{B}$  NMR ( $\text{CD}_2\text{Cl}_2$ , 96 MHz): -1.9 ppm (d, BH,  $^1J_{\text{BH}} = 96$  Hz), -15.4 (s,  $[\text{B}(\text{C}_6\text{F}_5)_4]$ );  $^{11}\text{B}\{^1\text{H}\}$  NMR ( $\text{CD}_2\text{Cl}_2$ , 96 MHz): -1.6 (s, broad, BH), -15.0 (s,  $[\text{B}(\text{C}_6\text{F}_5)_4]$ ); partial  $^{13}\text{C}\{^1\text{H}\}$  NMR ( $\text{CD}_2\text{Cl}_2$ , 75 MHz): 175.30, 155.43, 144.00 (DMAP), 138.60, 133.54, 132.03, 120.77, 108.00 (DMAP), 40.24 (DMAP-NMe<sub>2</sub>), 17.82, 14.79, 12.90, 9.87 (signals for the  $\text{B}(\text{C}_6\text{F}_5)_4$  anion were not assigned);  $^{19}\text{F}$  NMR ( $\text{CD}_2\text{Cl}_2$ , 282 MHz): -133.12 (s, 2F), -163.72 (t, 1F,  $^3J_{\text{FF}} = 20$  Hz), -167.54 (m, 2F). ESI<sup>+</sup> (*m/z*, nature of peak): 388.97,  $[\text{M}]^+$ ; 266.94,  $[[\text{M}]-\text{DMAP}]^+$ ; 122.91,  $[\text{DMAP}+\text{H}]^+$ .  $\lambda_{\text{max}}$ : 360, 532 nm;  $\lambda_{\text{em}}$ : 542.  $\phi_{\text{fl}} = 0.81$ . Anal. Calcd for  $\text{C}_{48}\text{H}_{34}\text{F}_{20}\text{B}_2\text{N}_4$ : C, 53.96; H, 3.21; N, 5.24. Found: C, 53.61; H, 3.49; N, 5.02.

Synthesis of **[3-D]**: Performed according to the preparation of **[3-H]**. Yield: 59 %.  $^2\text{H}$  NMR ( $\text{CD}_2\text{Cl}_2$ , 46 MHz): 4.36 (broad).

### Molecular Orbital Calculations (MO)

MO calculations employed the Gaussian03 suite of programs.<sup>6</sup> For the B-H and B-F cations involved in this study, the B3LYP/6-311+G\*\* method was used for both optimization and NICS(1) calculations. Structures were fully optimized and verified as ground-states. Two conformations exist for each cation, with the ethyl-substituent of these on the same or opposite faces, the latter marginally more stable and in agreement with the X-ray data,  $E_{\text{B-H}} = -796.717020$ ,  $E_{\text{B-F}} = -896.052223$  Hartrees. NICS(1) calculations<sup>7</sup> were carried out for both the 5- and 6-membered rings, and the values reported are averages of the quite similar +1 and -1 z-axis values.  $\text{C}_4\text{N}$ -ring = -9.8 (**2-H**), -4.3 (**2-F**);  $\text{C}_3\text{N}_2\text{B}$ -ring = +0.70 (**2-H**); +0.3 (**2-F**).

### X-Ray Crystallography.

Data were collected on a Bruker P4/RA/SMART 1000 CCD diffractometer<sup>8</sup> using Mo  $K\alpha$  radiation at  $-80^\circ\text{C}$ . Unit cell parameters were obtained from a least-squares refinement of the setting angles of the number of reflections from the data collection. An empirical absorption correction was applied to the data through use of the *SADABS* procedure. The structures were solved using the direct methods program *SHELXS-86*,<sup>9</sup> and full-matrix least-squares refinement on  $F^2$  was completed using the program *SHELXL-93*.<sup>10</sup>

### Supporting Information References

- (1) a) J. J. Olmsted III, *Phys. Chem.*, 1979, **83**, 2581. b) M. R. Pinto, Y. Takahata, T. D. Z. Atvars, *J. Photochem. Photobiol. A*, 2001, **143**, 119.
- (2) V. J. Scott, R. Çelenligil-Çetin, O. V. Ozerov, *J. Am. Chem. Soc.*, 2005, **127**, 2852.
- (3) H. Falk, O. Hofer, H. Lehner, *Monatsh. Chem.*, 1974, **105**, 169.
- (4) J. J. Eisch, S-G. Rhee, *J. Am. Chem. Soc.*, 1974, **96**, 7276.
- (5) R. F. Childs, D. L. Mulholland, A. Nixon, *Can. J. Chem.*, 1982, **60**, 801.

(6) Frisch, M. J.; Trucks, G. W.; Schlegel, H. B.; Scuseria, G. E.; Robb, M. A.; Cheeseman, J. R.; Montgomery, Jr. J. A.; Vreven, T.; Kudin, K. N.; Burant, J. C.; Millam, J. M.; Iyengar, S. S.; Tomasi, J.; Barone, V.; Mennucci, B.; Cossi, M.; Scalmani, G.; Rega, N.; Petersson, G. A.; Nakatsuji, H.; Hada, M.; Ehara, M.; Toyota, K.; Fukuda, R.; Hasegawa, J.; Ishida, M.; Nakajima, T.; Honda, Y.; Kitao, O.; Nakai, H.; Klene, M.; Li, X.; Knox, J. E.; Hratchian, H. P.; Cross, J. B.; Adamo, C.; Jaramillo, J.; Gomperts, R.; Stratmann, R. E.; Yazyev, O.; Austin, A. J.; Cammi, R.; Pomelli, C.; Ochterski, J. W.; Ayala, P. Y.; Morokuma, K.; Voth, G. A.; Salvador, P.; Dannenberg, J. J.; Zakrzewski, V. G.; Dapprich, S.; Daniels, A. D.; Strain, M. C.; Farkas, O.; Malick, D. K.; Rabuck, A. D.; Raghavachari, K.; Foresman, J. B.; Ortiz, J. V.; Cui, Q.; Baboul, A. G.; Clifford, S.; Cioslowski, J.; Stefanov, B. B.; Liu, G.; Liashenko, A.; Piskorz, P.; Komaromi, I.; Martin, R. L.; Fox, D. J.; Keith, T.; Al-Laham, M. A.; Peng, C. Y.; Nanayakkara, A.; Challacombe, M.; Gill, P. M. W.; Johnson, B.; Chen, W.; Wong, M. W.; Gonzalez, C.; Pople, J. A. Gaussian 03, Revision B.05; Gaussian, Inc.: Pittsburgh, PA, 2003.

(7) P. v. R. Schleyer, C. Maerker, A. Dransfeld, H. Jiao, N. J. R. van Eikema Hommes, *J. Am. Chem. Soc.*, 1996, **118**, 6317

(8) Programs for diffractometer operation, data collection, data reduction and absorption correction were those supplied by Bruker.

(9) Sheldrick, G. M. *Acta Crystallogr.* **1990**, *A46*, 467–473.

(10) Sheldrick, G. M., *SHELXL-93*, Program for crystal structure determination, **1993**, University of Göttingen, Germany.

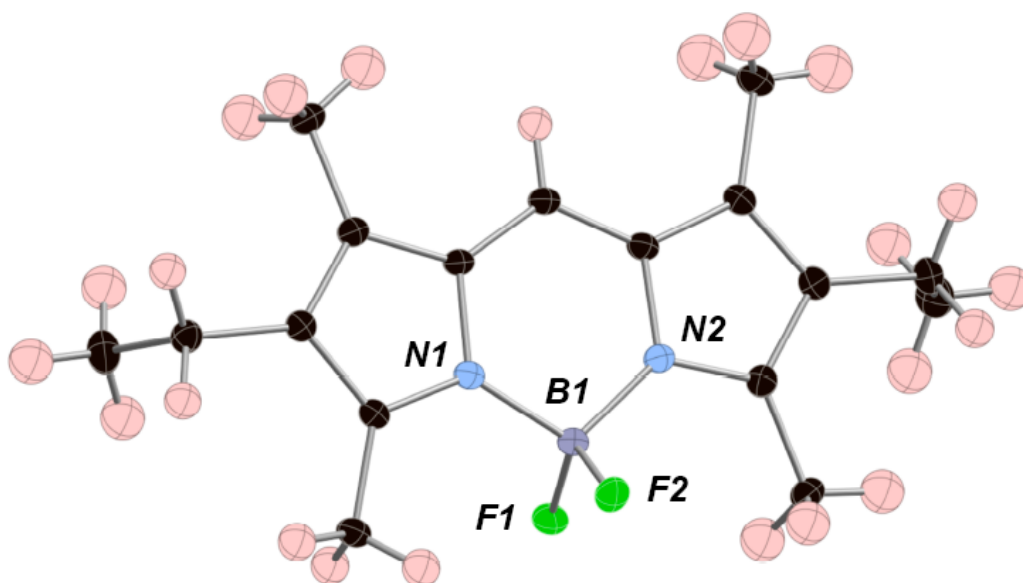

Figure S1. Thermal Ellipsoid Diagram of **1**. Selected bond distances (Å): F1-B1, 1.3891(19); F2-B1, 1.3938(19); N1-B1, 1.552(2); N2-B1, 1.554(2). Selected bond angles (°): F1-B1-F2, 108.79(12); F1-B1-N1, 110.40(12); F2-B1-N1, 110.04(12); F1-B1-N2, 110.35(12); F2-B1-N2, 110.22(12); N1-B1-N2, 107.05(11). Crystal data for **1**

$C_{17}H_{23}BF_2N_2$ ,  $M = 304.18$ ,  $T = 173(2)$  K, space group  $P-1$ , triclinic,  $a = 8.554(2)$ ,  $b = 9.258(4)$ ,  $c = 12.068(5)$ ,  $\alpha = 100.439(18)$ ,  $\beta = 103.76(2)$ ,  $\gamma = 113.981(19)$ ,  $V = 805.5(5)$  Å<sup>3</sup>,  $Z = 2$ ,  $D_c = 1.254$  g cm<sup>-3</sup>,  $\mu(\text{Mo-K}\alpha) = 0.089$  mm<sup>-1</sup>, 6894 reflections measured, 3646 unique ( $R_{\text{int}} = 0.0226$ ) which were used in all calculations. The final  $R$  and  $wR(F^2)$  were 0.0430 and 0.1069, respectively.

Table S1. Final Coordinates for Optimized **2-F**

| Atomic No. | x         | y         | z         |
|------------|-----------|-----------|-----------|
| 7          | -1.220843 | -0.557360 | 0.110691  |
| 6          | -1.206179 | 0.854318  | 0.108331  |
| 6          | -2.537469 | 1.302417  | 0.230109  |
| 6          | -2.540299 | -0.968518 | 0.232441  |
| 6          | -3.363179 | 0.158006  | 0.307761  |
| 5          | 0.000015  | -1.312007 | -0.000001 |
| 7          | 1.220854  | -0.557334 | -0.110707 |
| 6          | 2.540322  | -0.968464 | -0.232445 |
| 6          | 3.363177  | 0.158075  | -0.307766 |
| 6          | 2.537443  | 1.302471  | -0.230109 |
| 6          | 1.206163  | 0.854344  | -0.108333 |
| 6          | -0.000016 | 1.533117  | 0.000002  |
| 1          | -0.000027 | 2.615084  | 0.000001  |
| 6          | 2.928252  | -2.404255 | -0.272561 |
| 1          | 2.449728  | -2.923736 | -1.107745 |
| 1          | 2.626440  | -2.923393 | 0.641688  |
| 1          | 4.006911  | -2.501435 | -0.379933 |
| 6          | 2.988733  | 2.723153  | -0.282738 |
| 1          | 3.504155  | 2.929043  | -1.226042 |
| 1          | 3.699259  | 2.936558  | 0.520983  |
| 1          | 2.160513  | 3.426293  | -0.194096 |
| 6          | 4.862831  | 0.155658  | -0.423610 |
| 1          | 5.176919  | 1.050235  | -0.968336 |
| 1          | 5.182273  | -0.691828 | -1.036099 |
| 6          | 5.582827  | 0.107100  | 0.936985  |
| 1          | 6.665448  | 0.124961  | 0.795235  |
| 1          | 5.330941  | -0.802143 | 1.488680  |
| 1          | 5.312482  | 0.960985  | 1.563171  |
| 6          | -2.988787 | 2.723089  | 0.282781  |
| 1          | -2.160613 | 3.426249  | 0.193866  |
| 1          | -3.503943 | 2.929014  | 1.226225  |
| 1          | -3.699550 | 2.936430  | -0.520744 |
| 6          | -2.928202 | -2.404317 | 0.272544  |
| 1          | -2.626245 | -2.923470 | -0.641647 |
| 1          | -4.006874 | -2.501517 | 0.379765  |
| 1          | -2.449788 | -2.923766 | 1.107811  |
| 6          | -4.862832 | 0.155566  | 0.423615  |

|   |           |           |           |
|---|-----------|-----------|-----------|
| 1 | -5.176915 | 1.050051  | 0.968498  |
| 1 | -5.182270 | -0.692023 | 1.035963  |
| 6 | -5.582837 | 0.107232  | -0.936984 |
| 1 | -5.312525 | 0.961234  | -1.563023 |
| 1 | -6.665458 | 0.125037  | -0.795223 |
| 1 | -5.330929 | -0.801907 | -1.488840 |
| 9 | 0.000025  | -2.639668 | -0.000021 |

Table S2. Final Coordinates for Optimized **2-H**

| Atomic No. | x         | y         | z         |
|------------|-----------|-----------|-----------|
| 7          | 1.208324  | -0.690749 | -0.109334 |
| 6          | 1.204122  | 0.719327  | -0.108869 |
| 6          | 2.537976  | 1.159828  | -0.232344 |
| 6          | 2.524701  | -1.109257 | -0.231215 |
| 6          | 3.357403  | 0.008351  | -0.309015 |
| 5          | 0.000038  | -1.460971 | -0.000109 |
| 1          | 0.000129  | -2.638765 | -0.000178 |
| 7          | -1.208260 | -0.690881 | 0.109236  |
| 6          | -2.524643 | -1.109531 | 0.231104  |
| 6          | -3.357410 | 0.007975  | 0.309007  |
| 6          | -2.538047 | 1.159564  | 0.232435  |
| 6          | -1.204192 | 0.719185  | 0.108939  |
| 6          | -0.000055 | 1.402483  | 0.000073  |
| 1          | -0.000123 | 2.484622  | 0.000140  |
| 6          | -2.892076 | -2.550911 | 0.263753  |
| 1          | -2.374782 | -3.077001 | 1.071275  |
| 1          | -2.624533 | -3.048959 | -0.673465 |
| 1          | -3.964033 | -2.668044 | 0.412475  |
| 6          | -2.999101 | 2.576633  | 0.288335  |
| 1          | -3.514381 | 2.777302  | 1.232978  |
| 1          | -3.713018 | 2.786690  | -0.513394 |
| 1          | -2.175656 | 3.285364  | 0.199356  |
| 6          | -4.856848 | -0.004505 | 0.425194  |
| 1          | -5.177419 | 0.885943  | 0.972986  |
| 1          | -5.170440 | -0.856565 | 1.034551  |
| 6          | -5.576841 | -0.053749 | -0.935392 |
| 1          | -6.659610 | -0.043394 | -0.793732 |
| 1          | -5.318764 | -0.959827 | -1.489487 |
| 1          | -5.312034 | 0.803550  | -1.559282 |
| 6          | 2.998864  | 2.576960  | -0.288160 |
| 1          | 2.175416  | 3.285580  | -0.198338 |
| 1          | 3.513385  | 2.777969  | -1.233149 |
| 1          | 3.713378  | 2.786847  | 0.513077  |
| 6          | 2.892388  | -2.550575 | -0.263901 |
| 1          | 2.625846  | -3.048435 | 0.673711  |

|   |          |           |           |
|---|----------|-----------|-----------|
| 1 | 3.964236 | -2.667521 | -0.413586 |
| 1 | 2.374433 | -3.076976 | -1.070778 |
| 6 | 4.856843 | -0.004073 | -0.425176 |
| 1 | 5.177461 | 0.886833  | -0.972188 |
| 1 | 5.170429 | -0.855630 | -1.035248 |
| 6 | 5.576788 | -0.054475 | 0.935398  |
| 1 | 5.312146 | 0.802444  | 1.559880  |
| 1 | 6.659563 | -0.044266 | 0.793780  |
| 1 | 5.318491 | -0.960886 | 1.488845  |

Table S3. Calculated Heavy Atom Distances for **2-F** and **2-H**.

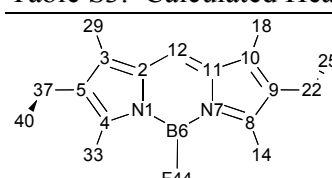


| <b>2-F</b> | <b>Distance (Å)</b> | <b>2-H</b> | <b>Distance Å</b> |
|------------|---------------------|------------|-------------------|
| N1-C2      | 1.411756            | N1-C2      | 1.410082          |
| C2-C3      | 1.409948            | C2-C3      | 1.410125          |
| C3-C5      | 1.413331            | C3-C5      | 1.415358          |
| C4-C5      | 1.397090            | C4-C5      | 1.395884          |
| N1-C4      | 1.387386            | N1-C4      | 1.386670          |
| N1-B6      | 1.439528            | N1-B6      | 1.437055          |
| B6-F44     | 1.327661            | B6-H7      | 1.177793          |
| B6-N7      | 1.439526            | B6-N8      | 1.437004          |
| N7-C8      | 1.387388            | N8-C9      | 1.386716          |
| C8-C9      | 1.397088            | C9-C10     | 1.395847          |
| C9-C10     | 1.413333            | C10-C11    | 1.415407          |
| C10-C11    | 1.409948            | C11-C12    | 1.410089          |
| C11-C12    | 1.388286            | C12-C13    | 1.388775          |
| C2-C12     | 1.388284            | C2-C13     | 1.388745          |
| C3-C29     | 1.491567            | C3-C30     | 1.491240          |
| C4-C33     | 1.487816            | C4-C34     | 1.487837          |
| C5-C37     | 1.504123            | C5-C38     | 1.503984          |
| C37-C40    | 1.540121            | C38-C41    | 1.540137          |
| C8-C14     | 1.487815            | C9-C15     | 1.487834          |
| C9-C22     | 1.504123            | C10-C23    | 1.503984          |
| C10-C18    | 1.491567            | C11-C19    | 1.491235          |
| C22-C25    | 1.540121            | C23-C26    | 1.540133          |

Table S4. Mulliken Population Analysis for Cation **2-F**

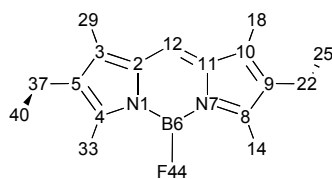

| Atom | Charge    | Charge with hydrogens summed into heavy atoms |
|------|-----------|-----------------------------------------------|
| 1N   | 0.013893  | 0.013893                                      |
| 2C   | 0.036472  | 0.036472                                      |
| 3C   | 0.114078  | 0.114078                                      |
| 4C   | -0.257283 | -0.257283                                     |
| 5C   | 0.476421  | 0.476421                                      |
| 6B   | 0.802926  | 0.802926                                      |
| 7N   | 0.013905  | 0.013905                                      |
| 8C   | -0.257313 | -0.257313                                     |
| 9C   | 0.476495  | 0.476495                                      |
| 10C  | 0.114011  | 0.114011                                      |
| 11C  | 0.036415  | 0.036415                                      |
| 12C  | -0.298980 | -0.151412                                     |
| 13H  | 0.147569  | 0.000000                                      |
| 14C  | -0.722671 | -0.154597                                     |
| 15H  | 0.195280  | 0.000000                                      |
| 16H  | 0.200075  | 0.000000                                      |
| 17H  | 0.172719  | 0.000000                                      |
| 18C  | -0.521100 | 0.004761                                      |
| 19H  | 0.192053  | 0.000000                                      |
| 20H  | 0.184636  | 0.000000                                      |
| 21H  | 0.149173  | 0.000000                                      |
| 22C  | -0.284544 | 0.019134                                      |
| 23H  | 0.147877  | 0.000000                                      |
| 24H  | 0.155801  | 0.000000                                      |
| 25C  | -0.526266 | -0.073446                                     |
| 26H  | 0.165861  | 0.000000                                      |
| 27H  | 0.145359  | 0.000000                                      |
| 28H  | 0.141600  | 0.000000                                      |
| 29C  | -0.521105 | 0.004757                                      |
| 30H  | 0.149172  | 0.000000                                      |
| 31H  | 0.192070  | 0.000000                                      |
| 32H  | 0.184620  | 0.000000                                      |
| 33C  | -0.722667 | -0.154599                                     |
| 34H  | 0.200063  | 0.000000                                      |
| 35H  | 0.172715  | 0.000000                                      |
| 36H  | 0.195290  | 0.000000                                      |
| 37C  | -0.284555 | 0.019128                                      |
| 38H  | 0.147893  | 0.000000                                      |
| 39H  | 0.155790  | 0.000000                                      |



|     |           |           |
|-----|-----------|-----------|
| 40C | -0.526270 | -0.073452 |
| 41H | 0.141597  | 0.000000  |
| 42H | 0.165861  | 0.000000  |
| 43H | 0.145360  | 0.000000  |
| 44F | -0.010295 | -0.010295 |

Sum of Mulliken charges= 1.00000

Table S5. Mulliken Population Analysis for Cation of **2-H**

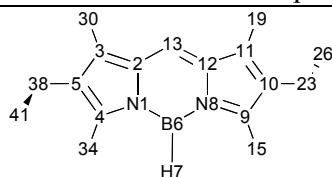

| Atom | Charge    | Charge with hydrogens summed into heavy atoms |
|------|-----------|-----------------------------------------------|
| 1N   | 0.274305  | 0.274305                                      |
| 2C   | -0.044241 | -0.044241                                     |
| 3C   | 0.230307  | 0.230307                                      |
| 4C   | -0.255025 | -0.255025                                     |
| 5C   | 0.504366  | 0.504366                                      |
| 6B   | 0.409020  | 0.420715                                      |
| 7H   | 0.011695  | 0.000000                                      |
| 8N   | 0.274177  | 0.274177                                      |
| 9C   | -0.254742 | -0.254742                                     |
| 10C  | 0.504314  | 0.504314                                      |
| 11C  | 0.230168  | 0.230168                                      |
| 12C  | -0.044229 | -0.044229                                     |
| 13C  | -0.325808 | -0.176739                                     |
| 14H  | 0.149069  | 0.000000                                      |
| 15C  | -0.839534 | -0.283044                                     |
| 16H  | 0.185314  | 0.000000                                      |
| 17H  | 0.198327  | 0.000000                                      |
| 18H  | 0.172848  | 0.000000                                      |
| 19C  | -0.515468 | 0.009333                                      |
| 20H  | 0.191460  | 0.000000                                      |
| 21H  | 0.183890  | 0.000000                                      |
| 22H  | 0.149451  | 0.000000                                      |
| 23C  | -0.284048 | 0.018432                                      |
| 24H  | 0.148233  | 0.000000                                      |
| 25H  | 0.154247  | 0.000000                                      |
| 26C  | -0.528198 | -0.076454                                     |
| 27H  | 0.165410  | 0.000000                                      |
| 28H  | 0.144691  | 0.000000                                      |
| 29H  | 0.141643  | 0.000000                                      |
| 30C  | -0.515613 | 0.009227                                      |

|     |           |           |
|-----|-----------|-----------|
| 31H | 0.149448  | 0.000000  |
| 32H | 0.191512  | 0.000000  |
| 33H | 0.183880  | 0.000000  |
| 34C | -0.839511 | -0.282988 |
| 35H | 0.198428  | 0.000000  |
| 36H | 0.172870  | 0.000000  |
| 37H | 0.185225  | 0.000000  |
| 38C | -0.284005 | 0.018536  |
| 39H | 0.148252  | 0.000000  |
| 40H | 0.154289  | 0.000000  |
| 41C | -0.528170 | -0.076416 |
| 42H | 0.141670  | 0.000000  |
| 43H | 0.165410  | 0.000000  |
| 44H | 0.144675  | 0.000000  |

---

Sum of Mulliken charges = 1.00000
